# Supplementary material
Source: PubMed Central journal article supplement (PMC10164410)

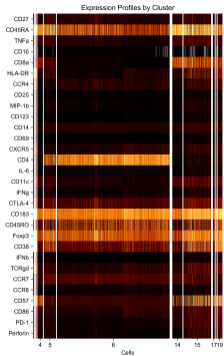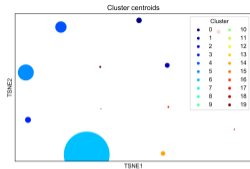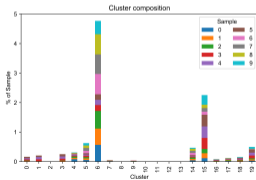

Supplement: NIHMS1891783-supplement-Figure_S11.pdf [file NIHMS1891783-supplement-Figure_S11.pdf]

(a)

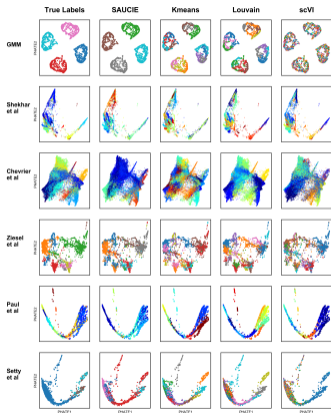

(b)

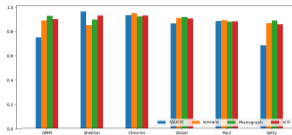

(c)

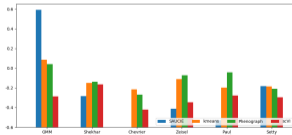

Supplement: NIHMS1891783-supplement-Figure_S2.pdf [file NIHMS1891783-supplement-Figure_S2.pdf]

(a)

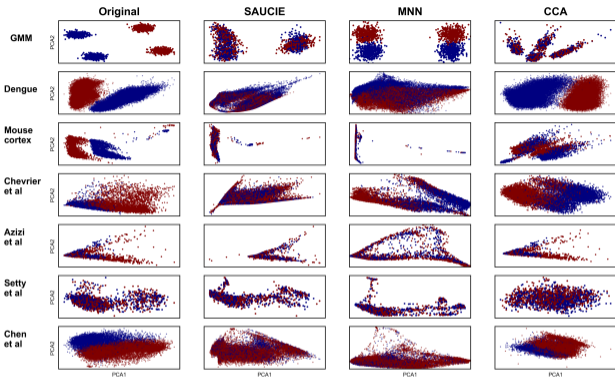

(b)

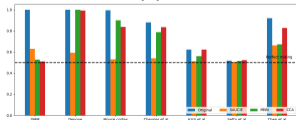

(c)

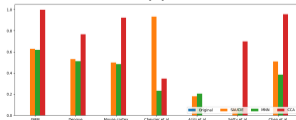

Supplement: NIHMS1891783-supplement-Figure_S3.pdf [file NIHMS1891783-supplement-Figure_S3.pdf]

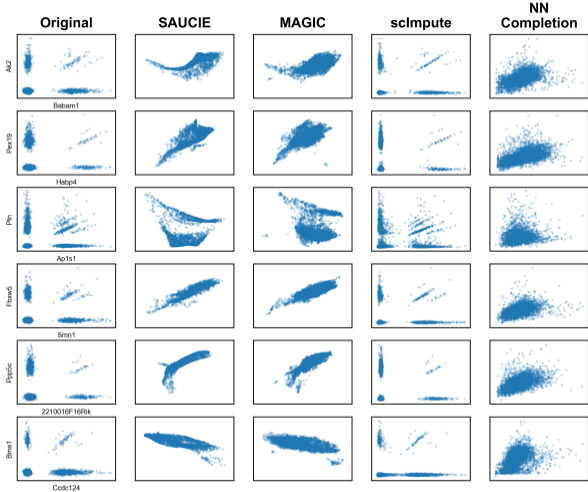

Supplement: NIHMS1891783-supplement-Figure_S5.pdf [file NIHMS1891783-supplement-Figure_S5.pdf]

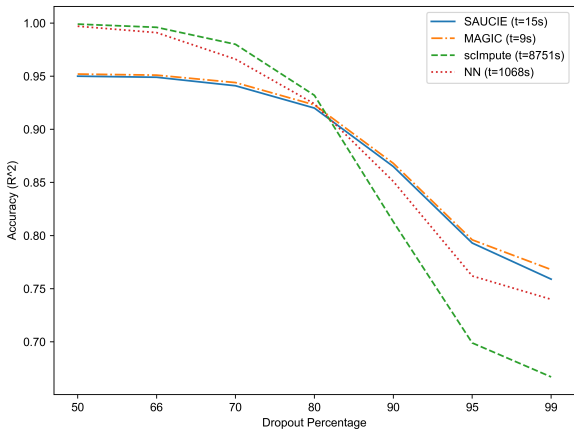

Supplement: NIHMS1891783-supplement-Figure_S6.pdf [file NIHMS1891783-supplement-Figure_S6.pdf]

TCRgd

IL-6

IFN $\gamma$ 

CD86

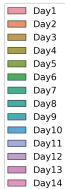8  
6  
4  
2  
0

Before

After

Before

After

Before

After

Before

After

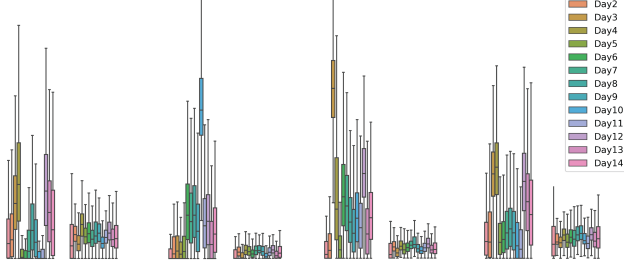

Supplement: NIHMS1891783-supplement-Figure_S7.pdf [file NIHMS1891783-supplement-Figure_S7.pdf]

Before

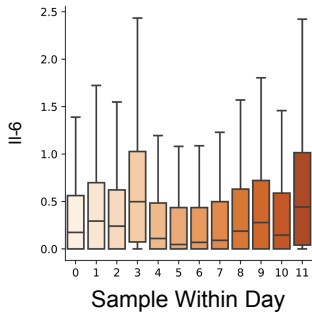

After

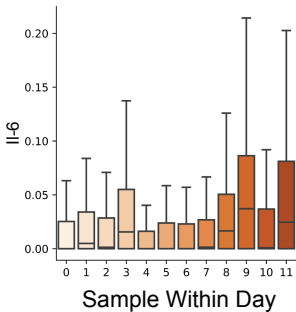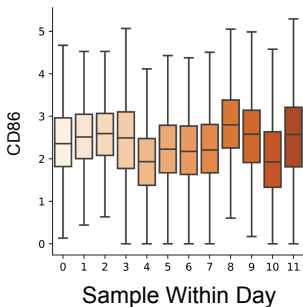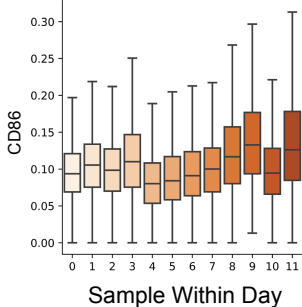

Supplement: NIHMS1891783-supplement-Figure_S8.pdf [file NIHMS1891783-supplement-Figure_S8.pdf]

Log(Number of Clusters)

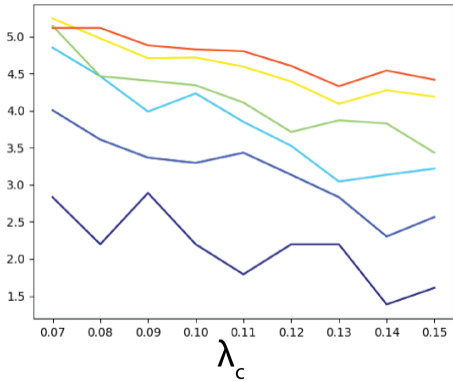

Supplement: NIHMS1891783-supplement-Figure_S9.pdf [file NIHMS1891783-supplement-Figure_S9.pdf]
